# Supplementary material
Source: Research Square preprint supplement (doi:10.21203/rs.3.rs-8899879/v1)
Supplement: Supplementary file 1 [file bd84dfdfec27baf042e78168.xlsx]

## Sheet: Sheet 1
character	normal	possible sarcopenia	p	obesity	p	sarcopenic obesity	p	p for trend(character2integer)	p for interaction
sex									0.55
male	ref	1.22(0.89,1.66)	0.22	1.16(0.87,1.56)	0.31	2.00(1.10,3.60)	0.02	0.06
female	ref	1.40(1.06,1.85)	0.02	1.04(0.83,1.30)	0.74	1.79(1.26,2.55)	0.001	0.16
age2									0.02
≥60	ref	1.45(1.11,1.90)	0.01	1.34(1.02,1.75)	0.03	1.68(1.16,2.45)	0.01	0.02
<60	ref	1.19(0.79,1.78)	0.39	0.89(0.70,1.13)	0.33	2.69(1.59,4.50)	<0.001	0.54
sleeptime									0.13
≥7	ref	1.24(0.91,1.70)	0.17	0.85(0.66,1.11)	0.24	1.57(0.99,2.45)	0.05	0.96
<7	ref	1.40(1.06,1.85)	0.02	1.31(1.04,1.67)	0.02	2.07(1.39,3.07)	<0.001	0.001
residence_place									0.78
rural	ref	1.34(1.06,1.70)	0.02	1.09(0.88,1.34)	0.43	1.67(1.16,2.42)	0.01	0.09
urban	ref	1.29(0.83,2.01)	0.25	1.05(0.76,1.46)	0.78	2.12(1.27,3.53)	0.004	0.12
edu									0.4
Illiteracy	ref	1.45(1.11,1.90)	0.01	1.12(0.88,1.42)	0.35	1.69(1.16,2.46)	0.01	0.1
Middle school	ref	1.44(0.73,2.76)	0.28	1.36(0.85,2.19)	0.20	3.85(1.51,9.58)	0.004	0.03
Primary school	ref	1.01(0.65,1.55)	0.98	0.93(0.64,1.33)	0.68	2.02(1.07,3.77)	0.03	0.44
High school or above	ref	0.59(0.14,2.01)	0.42	0.75(0.35,1.60)	0.46	0.71(0.09,3.52)	0.71	0.46
marry									0.39
married with spouse present	ref	1.36(1.08,1.70)	0.01	1.02(0.84,1.24)	0.81	1.83(1.30,2.57)	<0.001	0.1
Other	ref	1.27(0.78, 2.08)	0.34	1.39(0.90, 2.16)	0.13	1.80(0.96, 3.40)	0.07	0.05
smoke									0.43
current smoke	ref	1.17(0.81, 1.70)	0.40	1.31(0.91, 1.89)	0.14	1.46(0.71, 2.90)	0.29	0.1
never smoke	ref	1.39(1.06,1.81)	0.02	1.04(0.84,1.29)	0.73	1.83(1.29,2.59)	<0.001	0.13
former	ref	1.33(0.62, 2.86)	0.46	0.87(0.46, 1.67)	0.68	3.31(1.01,11.88)	0.05	0.56
drink_freqency_last_year									0.4
no	ref	1.24(0.97,1.59)	0.08	0.99(0.81,1.22)	0.93	1.68(1.20,2.35)	0.002	0.21
>1m	ref	1.34(0.86,2.10)	0.20	1.50(1.01,2.24)	0.05	1.80(0.82,3.86)	0.14	0.03
<1m	ref	2.20(0.99, 4.89)	0.05	0.92(0.46, 1.83)	0.81	2.85(0.70, 12.02)	0.14	0.63
hypertension									0.47
yes	ref	1.55(1.10,2.17)	0.01	1.24(0.94,1.65)	0.13	1.88(1.24,2.84)	0.003	0.03
no	ref	1.25(0.96,1.63)	0.10	1.00(0.80,1.26)	0.98	1.94(1.24,3.02)	0.003	0.2
DM									0.25
no	ref	1.30(1.05,1.62)	0.02	1.01(0.84,1.22)	0.90	1.62(1.17,2.25)	0.004	0.22
yes	ref	1.60(0.79,3.24)	0.19	1.84(1.08,3.21)	0.03	3.76(1.77,8.12)	<0.001	0.001
